# Supplementary material
Source: PubMed Central journal article supplement (PMC5036314)
Supplement: Supp_Figure2.pdf [file Supp_Figure2.pdf]

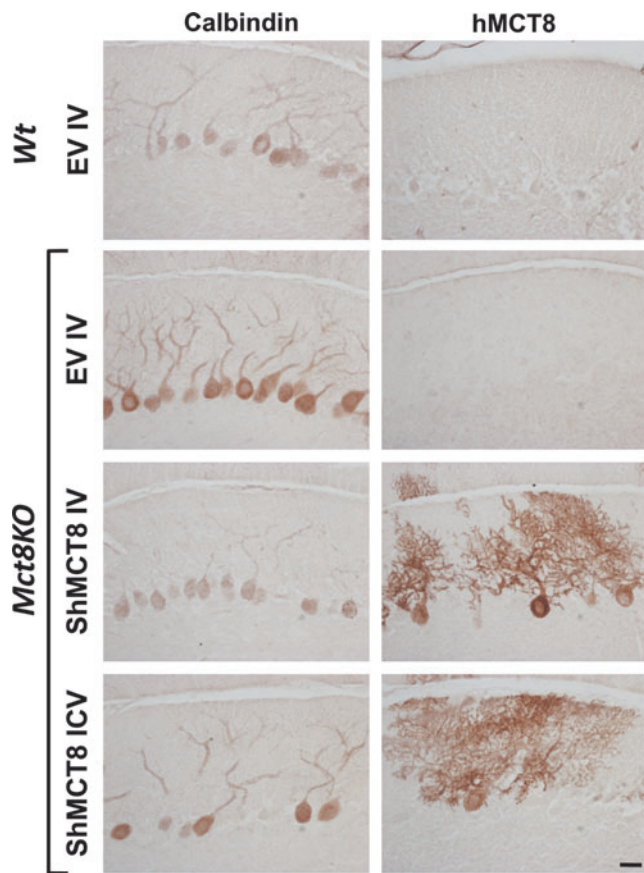

**SUPPLEMENTARY FIG. S2.** Staining of cerebellar lobule 10 with antibodies to calbindin. Adjacent sections were used for staining with each antibody. There is no morphological difference in Purkinje cells among the different genotypes or treatments. Differences in the intensity of calbindin staining reflect the previously observed inverse correlation between T3 concentration and calbindin expression. Scale bar = 50  $\mu$ m.
