# Supplementary material
Source: PubMed Central journal article supplement (PMC5036314)
Supplement: Supp_Figure3.pdf [file Supp_Figure3.pdf]

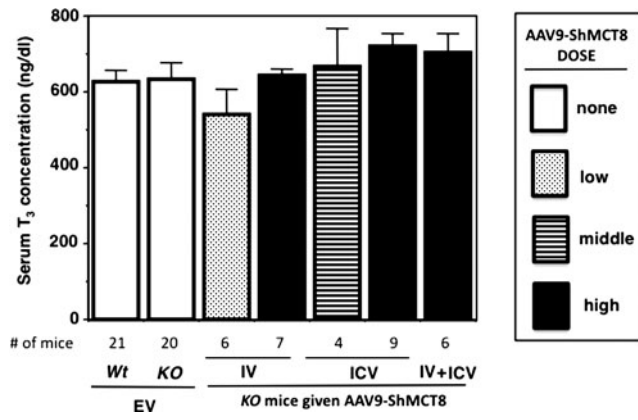

**SUPPLEMENTARY FIG. S3.** Serum T<sub>3</sub> concentration after treatment with LT<sub>3</sub>. Differences were not significant across genotype or treatment with AAV9 containing or not *ShMCT8*. Values are means ± SEM.
