# Supplementary material
Source: PubMed Central journal article supplement (PMC5036314)
Supplement: Supp_Table1.pdf [file Supp_Table1.pdf]

SUPPLEMENTARY TABLE S1. qPCR PRIMER SEQUENCES

| <i>Gene</i>       | <i>Forward primer</i>            | <i>Reverse primer</i>                 |
|-------------------|----------------------------------|---------------------------------------|
| <i>mouse Rp2</i>  | 5'-GCA CCA CGT CCA ATG ACA T-3'  | 5'-GTG CGG CTG CTT CCA TAA-3'         |
| <i>human MCT8</i> | 5'-GCT TTC TGG CTC AGC TCA GG-3' | 5'-TCC TCC ACA TAC TTC ATC AGG TGT-3' |
| <i>mouse Hr</i>   | 5'-CCA AGT CTG GGC CAA GTT TG-3' | 5'-TGT CCT TGG TCC GAT TGG AA-3'      |

qPCR, quantitative polymerase chain reaction.
